# Supplementary material for: System for Automated Geoscientific Analyses (SAGA) v. 2.1.4
Source: Copernicus journal article supplement (doi:10.5194/gmd-8-1991-2015), 2015-07-07
Supplement: Supplementary file 1 [file gmd-8-1991-2015-supplement-cover-letter.pdf › gmd-8-1991-2015-supplement-cover-letter.pdf]

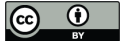

## *Supplement of*

## **System for Automated Geoscientific Analyses (SAGA) v. 2.1.4**

**O. Conrad et al.**

*Correspondence to:*

- gmd-8-1991-2015-supplement-cover-letter.pdf
- saga\_2.1.4\_src
  - saga-gis
    - \* AUTHORS
    - \* COPYING
    - \* ChangeLog
    - \* Makefile.am
    - \* NEWS
    - \* README
    - \* configure.ac
    - \* m4
    - \* src
  - saga\_setup\_readme.rtf
  - saga\_setup\_win32.iss
  - saga\_setup\_x64.iss

The copyright of individual parts of the supplement might differ from the CC-BY 3.0 licence.
